# Supplementary material for: Young Adult Physical Activity Trajectories and Midlife Nonalcoholic Fatty Liver Disease
Source: PubMed Central journal article supplement (PMC10589812; doi:10.1001/jamanetworkopen.2023.38952), 2023-10-20
Supplement: jamanetwopen-e2338952-s001.pdf [file jamanetwopen-e2338952-s001.pdf]

## Supplemental Online Content

de Brito JN, McDonough DJ, Mathew M, et al. Young adult physical activity trajectories and midlife nonalcoholic fatty liver disease. *JAMA Netw Open*. 2023;6(10):e2338952. doi:10.1001/jamanetworkopen.2023.38952

**eTable 1.** Average Posterior Probability by Physical Activity Trajectories

**eFigure.** Total Physical Activity Trajectories

**eTable 2.** Selected Baseline (Year 0) and Year 25 Participant Characteristics by Total Physical Activity Trajectory Groups (N= 2833)

**eTable 3.** Unadjusted and Adjusted Associations Between Total Physical Activity Trajectories from Young to Middle Adulthood and NAFLD at LA <51 at Year 25

**eTable 4.** Unadjusted and Adjusted Associations Between Moderate-Intensity and Vigorous-Intensity Physical Activity Trajectories from Young to Middle Adulthood and NAFLD at LA ≤40 at Year 25

This supplemental material has been provided by the authors to give readers additional information about their work

**eTable 1.** Average Posterior Probability by Physical Activity Trajectories.

| <b>Physical Activity Trajectories</b>              | <b>Average posterior probability</b> | <b>Proportion with posterior probabilities <math>\geq 0.70</math></b> |
|----------------------------------------------------|--------------------------------------|-----------------------------------------------------------------------|
| <b><i>Total Physical Activity</i></b>              |                                      |                                                                       |
| Very low stable                                    | 1.0                                  | 1.0                                                                   |
| Moderate stable                                    | 0.9                                  | 1.0                                                                   |
| High decreasing                                    | 0.9                                  | 1.0                                                                   |
| <b><i>Moderate-Intensity Physical Activity</i></b> |                                      |                                                                       |
| Very low stable                                    | 0.9                                  | 1.0                                                                   |
| Low increasing                                     | 0.9                                  | 1.0                                                                   |
| Moderate increasing                                | 0.9                                  | 1.0                                                                   |
| <b><i>Vigorous-Intensity Physical Activity</i></b> |                                      |                                                                       |
| Low stable                                         | 0.9                                  | 1.0                                                                   |
| Moderate decreasing                                | 0.9                                  | 1.0                                                                   |
| High decreasing                                    | 0.9                                  | 1.0                                                                   |

**eTable 2.** Selected Baseline (Year 0) and Year 25 Participant Characteristics by Total Physical Activity Trajectory Groups (N= 2833)

|                                      | <b>Total Physical Activity Trajectories</b> |                                            |                                           |
|--------------------------------------|---------------------------------------------|--------------------------------------------|-------------------------------------------|
|                                      | Low stable<br>(n = 1496)<br>mean ± SD       | Moderate stable<br>(n = 1032)<br>mean ± SD | High decreasing<br>(n = 305)<br>mean ± SD |
| <b>Baseline (Year 0)</b>             |                                             |                                            |                                           |
| Age, y, mean (SD)                    | 24.9 ± 3.7                                  | 25.0 ± 3.5                                 | 25.0 ± 3.3                                |
| Race, n (%)                          |                                             |                                            |                                           |
| Black                                | 924 (56)                                    | 371 (38)                                   | 84 (42)                                   |
| White                                | 725 (44)                                    | 615 (62)                                   | 114 (58)                                  |
| Sex, n (%)                           |                                             |                                            |                                           |
| Male                                 | 498 (30)                                    | 554 (56)                                   | 154 (78)                                  |
| Female                               | 1151 (70)                                   | 432 (44)                                   | 44 (22)                                   |
| Education, y                         | 13.7 ± 2.1                                  | 14.3 ± 2.2                                 | 14.4 ± 2.2                                |
| Current smoker, n (%)                | 437 (29)                                    | 246 (24)                                   | 40 (13)                                   |
| Alcohol drinker, n (%)               | 1379 (92)                                   | 873 (85)                                   | 178 (58)                                  |
| Alcohol intake, mL/day,<br>mean (SD) | 116.3 ± 256.5                               | 194.2 ± 358.0                              | 224.3 ± 342.6                             |
| Diet quality score                   | 4.7 ± 0.9                                   | 5.1 ± 1.0                                  | 5.2 ± 1.1                                 |
| Total physical activity, EU          | 263.9 ± 181.0                               | 566.7 ± 252.2                              | 923.9 ± 342.9                             |
| MPA, EU                              | 103.5 ± 81.0                                | 181.9 ± 106.2                              | 265.7 ± 138.5                             |
| VPA, EU                              | 160.4 ± 140.4                               | 384.8 ± 205.2                              | 658.2 ± 274.5                             |
| BMI, kg/m <sup>2</sup>               | 25.0 ± 5.5                                  | 24.0 ± 4.0                                 | 24.0 ± 3.3                                |
| Waist circumference, cm              | 77.6 ± 12.1                                 | 77.5 ± 9.9                                 | 79.0 ± 9.3                                |
| <b>Year 25</b>                       |                                             |                                            |                                           |
| Age, y                               | 50.0 ± 3.7                                  | 50.2 ± 3.6                                 | 50.1 ± 3.3                                |
| Education, y                         | 14.8 ± 2.7                                  | 15.4 ± 2.6                                 | 15.2 ± 2.6                                |
| Current smoker, n (%)                | 235 (16)                                    | 237 (23)                                   | 31 (10)                                   |
| Alcohol drinker, n (%)               | 1183 (79)                                   | 807 (78)                                   | 158 (52)                                  |
| Alcohol intake, mL/day               | 91.8 ± 153.8                                | 136.3 ± 168.6                              | 165.0 ± 188.6                             |
| Diet quality score                   | 5.2 ± 0.9                                   | 5.6 ± 0.9                                  | 5.7 ± 1.0                                 |
| Total physical activity, EU          | 196.1 ± 159.8                               | 463.2 ± 237.0                              | 829.9 ± 316.3                             |
| MPA, EU                              | 93.3 ± 80.3                                 | 175.3 ± 107.4                              | 266.7 ± 128.8                             |
| VPA, EU                              | 102.8 ± 122.6                               | 287.9 ± 195.4                              | 563.3 ± 279.9                             |
| BMI, kg/m <sup>2</sup>               | 31.6 ± 7.7                                  | 29.1 ± 6.2                                 | 28.2 ± 5.2                                |
| Waist circumference, cm              | 96.2 ± 16.6                                 | 93.0 ± 15.1                                | 92.4 ± 13.5                               |
| Liver attenuation, HU                | 55.5 ± 12.3                                 | 55.6 ± 11.3                                | 54.5 ± 10.9                               |
| < 51, n (%)                          | 411 (27)                                    | 222 (21)                                   | 48 (16)                                   |
| ≤ 40, n (%)                          | 168 (11)                                    | 93 (9)                                     | 20 (7)                                    |

Abbreviations: EU, exercise units; MPA, moderate-intensity physical activity; VPA, vigorous-intensity physical activity; BMI, Body Mass Index, HU, Hounsfield Units

<sup>a</sup> All variables have less than 1% missing, except for diet quality score Y20 (21% missing).

**eFigure.** Total Physical Activity Trajectories

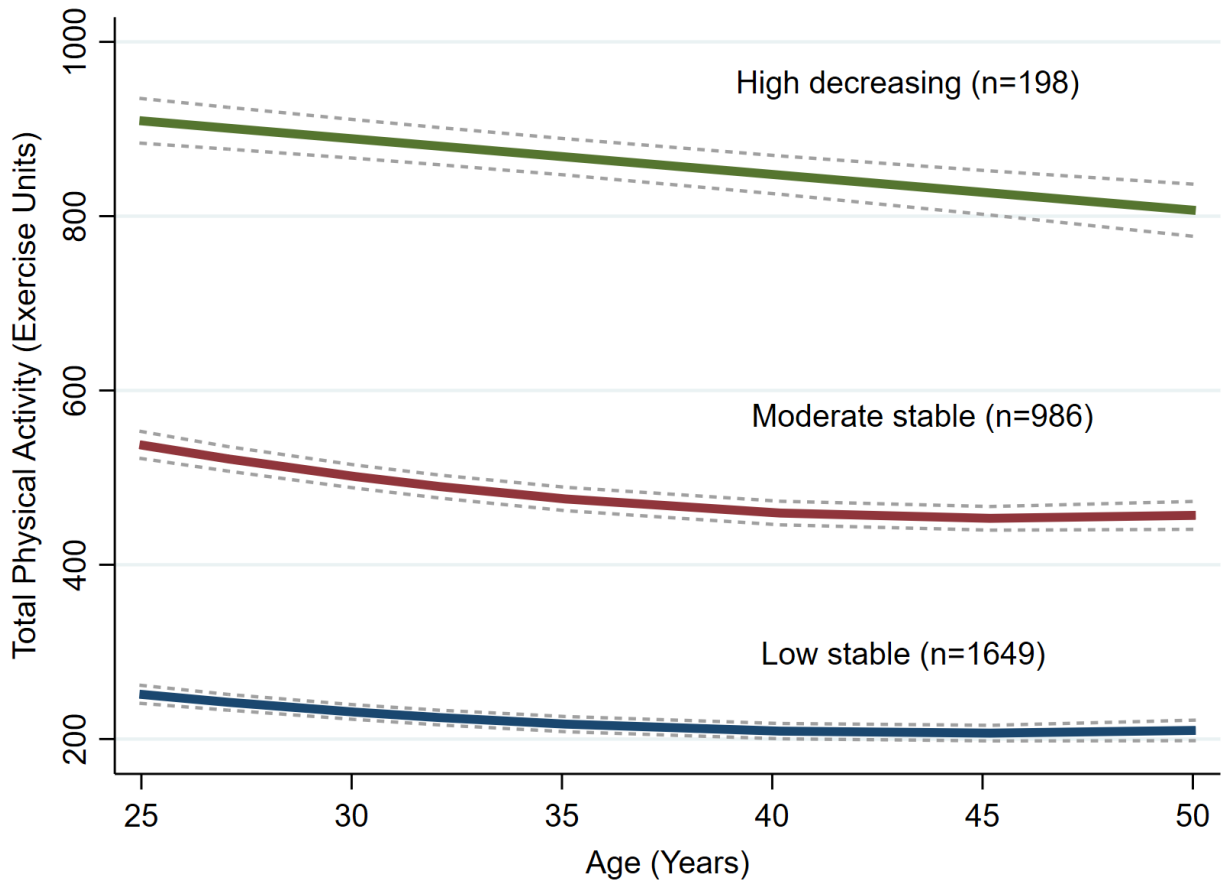

**eTable 3.** Unadjusted and Adjusted Associations Between Total Physical Activity Trajectories from Young to Middle Adulthood and NAFLD at LA <51 HU at Year 25

|                      | <b>Total Physical Activity</b> |        |                 |              |                 |              |
|----------------------|--------------------------------|--------|-----------------|--------------|-----------------|--------------|
|                      | Low stable                     |        | Moderate stable |              | High decreasing |              |
|                      | RR                             | 95% CI | RR              | 95% CI       | RR              | 95% CI       |
| Unadjusted           |                                |        | 0.90            | (0.78, 1.04) | 0.97            | (0.75, 1.26) |
| Model 1              |                                |        | 0.73            | (0.63, 0.84) | 0.69            | (0.53, 0.89) |
| Model 2              |                                |        | 0.73            | (0.63, 0.85) | 0.70            | (0.54, 0.91) |
| Model 3 <sup>a</sup> | Reference                      |        | 0.75            | (0.64, 0.88) | 0.75            | (0.56, 1.01) |
| Model 4              |                                |        | 0.79            | (0.68, 0.91) | 0.76            | (0.59, 0.98) |
| Model 5              |                                |        | 0.81            | (0.71, 0.94) | 0.78            | (0.61, 1.01) |

Abbreviations: NAFLD, non-alcoholic fatty liver disease; LA, liver attenuation; HU, Hounsfield Unit

Model 1 adjusted by sex, age, race, and study center. Model 2 adjusted by Model 1 covariates and education, smoking status, and alcohol consumption. Model 3 adjusted by Model 2 covariates and dietary intake. Model 4 adjusted by Model 2 covariates and Y0 BMI. Model 5 adjusted by Model 2 covariates and Y0 waist circumference.

<sup>a</sup> Total N = 2200 after the exclusion of participants with missing dietary intake.

**eTable 4.** Unadjusted and Adjusted Associations Between Moderate-Intensity and Vigorous-Intensity Physical Activity Trajectories from Young to Middle Adulthood and NAFLD at LA  $\leq$ 40 at Year 25

| <b>Total Physical Activity</b> |            |           |                 |              |                 |              |
|--------------------------------|------------|-----------|-----------------|--------------|-----------------|--------------|
|                                | Low stable |           | Moderate stable |              | High decreasing |              |
|                                | RR         | 95% CI    | RR              | 95% CI       | RR              | 95% CI       |
| Unadjusted                     |            |           | 0.93            | (0.73, 1.18) | 0.99            | (0.64, 1.53) |
| Model 1                        |            |           | 0.74            | (0.58, 0.95) | 0.71            | (0.45, 1.11) |
| Model 2                        |            | Reference | 0.75            | (0.58, 0.95) | 0.71            | (0.45, 1.13) |
| Model 3 <sup>a</sup>           |            |           | 0.79            | (0.60, 1.03) | 0.81            | (0.49, 1.34) |
| Model 4                        |            |           | 0.80            | (0.62, 1.24) | 0.78            | (0.50, 1.24) |
| Model 5                        |            |           | 0.84            | (0.65, 1.09) | 0.82            | (0.53, 1.29) |

  

| <b>Moderate-Intensity Physical Activity</b> |                 |           |                |              |                     |              |
|---------------------------------------------|-----------------|-----------|----------------|--------------|---------------------|--------------|
|                                             | Very low stable |           | Low increasing |              | Moderate increasing |              |
|                                             | RR              | 95% CI    | RR             | 95% CI       | RR                  | 95% CI       |
| Unadjusted                                  |                 |           | 1.16           | (0.92, 1.46) | 1.06                | (0.69, 1.62) |
| Model 1                                     |                 |           | 1.00           | (0.79, 1.27) | 0.85                | (0.55, 1.30) |
| Model 2                                     |                 | Reference | 1.02           | (0.80, 1.31) | 0.84                | (0.54, 1.31) |
| Model 3 <sup>a</sup>                        |                 |           | 1.10           | (0.84, 1.44) | 1.02                | (0.64, 1.62) |
| Model 4                                     |                 |           | 1.02           | (0.80, 1.30) | 0.89                | (0.56, 1.36) |
| Model 5                                     |                 |           | 1.05           | (0.83, 1.34) | 0.91                | (0.59, 1.42) |

  

| <b>Vigorous-Intensity Physical Activity</b> |            |           |                     |              |                 |              |
|---------------------------------------------|------------|-----------|---------------------|--------------|-----------------|--------------|
|                                             | Low stable |           | Moderate decreasing |              | High decreasing |              |
|                                             | RR         | 95% CI    | RR                  | 95% CI       | RR              | 95% CI       |
| Unadjusted                                  |            |           | 0.91                | (0.71, 1.15) | 0.74            | (0.43, 1.27) |
| Model 1                                     |            |           | 0.73                | (0.57, 0.93) | 0.53            | (0.31, 0.92) |
| Model 2                                     |            | Reference | 0.73                | (0.58, 0.91) | 0.51            | (0.29, 0.91) |
| Model 3 <sup>a</sup>                        |            |           | 0.83                | (0.63, 1.09) | 0.55            | (0.29, 1.04) |
| Model 4                                     |            |           | 0.81                | (0.63, 1.04) | 0.58            | (0.33, 1.02) |
| Model 5                                     |            |           | 0.85                | (0.67, 1.10) | 0.61            | (0.35, 1.06) |

Abbreviations: NAFLD, non-alcoholic fatty liver disease; LA, liver attenuation; HU, Hounsfield Unit

Model 1 adjusted by sex, age, race, and study center. Model 2 adjusted by Model 1 covariates and education, smoking status, and alcohol consumption. Model 3 adjusted by Model 2 covariates and dietary intake. Model 4 adjusted by Model 2 covariate and Y0 BMI. Model 5 adjusted by Model 2 covariates and Y0 waist circumference.

<sup>a</sup> Total N = 2200 after the exclusion of participants with missing dietary intake.
